# Supplementary material for: What Blockchain Are We Talking About? An Analytical Framework for Understanding Blockchain Applications in Agriculture and Food
Source: Frontiers journal article supplement (doi:10.3389/fbloc.2021.653128), 2021-04-29
Supplement: Table_1.XLSX [file Table_1.XLSX]

## Sheet: Usecases
No	Usecases	Status (Oct.2020)	Ledger	Token/Coin	Governance	Ecosystem	Initiator	Website	Funding	Year of establishment	Agrifood-sector
1	AGF-Chain	PoC	Hyperledger Fabric	No	Permissioned	Traders, Public authorities, IT services	Research	www.wur.eu/blockchain	PPP	2019	Arable farming
2	AgriDigital	Rollout	Quorum	Yes (AgriCoin)	Permissioned	Traders, banks farmers, IT services	Start-up	https://www.agridigital.io	PPP	2015	Arable farming
3	Agriledger	Rollout	R3 Corda	Yes	Permissioned	Farmers, traders	Start-up	http://www.agriledger.io/	PPP	2017	Food and cash crops
4	Agri-wallet	Rollout	Ethereum	Yes	Permissioned	Farmers, traders, financial services	Start-up	https://agri-wallet.com/	PPP	2017	Cash crops
5	Agrocorp	Rollout	Hyperledger Fabric	Yes	Permissioned	Traders, banks	Multinationals	https://agrocorp.com.sg/	Private	2018	Arable farming
6	Agroplexi	Development	Multichain	Yes	Public	Farmers, supply chain	Start-up	https://agroplexi.com/	Private	2018	Non specific
7	AgUnity	Rollout	Multichain	Yes	Permissioned	Farmers, cooperatives	Start-up	https://www.agunity.com/	PPP	2017	Arable farming
8	AlbertHeijn	Rollout	PowerChain	No	Permissioned	Retail	Multinationals	https://www.ah.nl/over-ah/duurzaamheid/onze-ketens/ah-sinaasappelsap	Private	2018	Retail
9	Beefchain	Rollout	Cardano	No	Public	Beef rancher, consumer	Start-up	https://beefchain.com/	Private	2018	Livestock
10	Beefledger	Rollout	Ethereum	Yes (BEEF)	Public	Beef supply chain	Start-up	https://beefledger.io/	Private	2019	Livestock
11	BlockchainWine	Rollout	VeChain	Yes (VET)	Public	Winery, retail	Start-up	https://www.vechain.com/	Private	2018	Retail, wine
12	BlockGrain	Rollout	Ethereum	Yes (AGRI)	Public	Farmers, insurers, traders	Start-up	https://mattersjournal.com/stories/blockgrainforfarmers;https://icotokennews.com/icos/blockgrain/	Private	2018	Grains, crops
13	BlocRice	Development	Stellar	Yes	Public	Rice growers, trader	NGO	https://cambodia.oxfam.org/BlocRice	PPP	2019	Arable
14	CarbonX	Rollout	Ethereum	Yes	Public	Citizens, IT services, standard organisations	Start-up	https://www.carbonx.ca/	ICO	2018	Forestry
15	Carrefour	Rollout	Hyperledger Fabric	No	Permissioned	Retail, supply chain, consumers	Multinationals	https://www.carrefour.com/en/group/food-transition/food-blockchain	Private	2017	Chicken
16	Climatecoin	Development	Ethereum	Yes	Permissioned	Citizens, IT services, standard organisations	Start-up	https://climatetrade.com/	ICO	2017	Non specific
17	Etherisc	Development	Ethereum	Yes	Public	Insurers, farmers	Multinationals	https://etherisc.com/	Private	2019	Arable farming
18	FairFood	Development	Fairchain	Yes	Public	Farmers, traders, consumers	NGO	https://fairfood.nl/en/blockchain/	PPP	2019	Retail
19	FarmDataWallet	PoC	Hyperledger Fabric	No	Permissioned	Farmers, supply chain, government agencies	Research	www.wur.eu/blockchain	PPP	2019	Arable farming
20	Farmobile	Rollout	DataStore	No	Permissioned	Farmers' cooperative	Farmers	https://markets.businessinsider.com/news/stocks/announcing-the-first-blockchain-enabled-farm-data-exchange-the-farmobile-datastore-1027374276#	Private	2018	Arable farming
21	Fishcoin	Development	Ethereum	Yes (FISH)	Public	Consumers, fishery	Start-up	https://fishcoin.co/	ICO	2017	Fishery
22	Flori-Chain	PoC	Hyperledger Fabric	No	Permissioned	Supply chain, government agencies certification bodies	Research	www.wur.eu/blockchain	PPP	2018	Horticulture
23	FoodCoin	Rollout	Ethereum	Yes (FOOD)	Public	Citizens, food system	Start-up	https://fcegroup.ch/files/foodcoin-whitepaper-tmp-2017-09-10.pdf	ICO	2017	All
24	Frievar	PoC	Hyperledger Fabric	No	Permissioned	Farmers, Supply chain	Start-up	http://agos-tech.com/	PPP	2019	Livestock
25	GrainChain	Rollout	Symbiont	No	Permissioned	Smallholder farmers	Multinationals	https://www.grainchain.io/	Private	2016	Arable farming
26	Jupiter	Development	Ethereum	Yes (JUP)	Public	Consumers, retail	Multinationals	https://www.jupitermarketingltd.com/	Private	2019	Retail, fruits
27	Land LayBy	PoC	Ethereum	Yes (HRBE)	Public	Farmers, Insurers	Start-up	https://hrbe.io/	PPP	2017	Arable farming
28	Moyee Coffee	Rollout	Fairchain	Yes	Public	Farmers, consumers	Start-up	https://www.moyeecoffee.com	PPP	2018	Retail
29	Nestlé	Rollout	Hyperledger Fabric	No	Permissioned	Retail, supply chain	Multinationals	https://www.nestle.com/media/news/nestle-blockchain-zoegas-coffee-brand	Private	2017	Retail
30	Nori	Development	Ethereum	Yes (NORI)	Public	Supply chain, consumers	Start-up	https://nori.com/	ICO	2017	Arable farming
31	Poseidon	Development	Stellar	Yes (OCEAN)	Public	Corporate, consumers, supply chain	Start-up	https://poseidon.eco/	ICO	2018	Forestry
32	Provenance	Development	Ethereum	No	Public	Fishers, retail, consumers	Start-up	https://www.provenance.org	PPP	2016	Fishery
33	Pure Grow	PoC	Ethereum	Yes	Public	Farmers, retail	Start-up	http://www.puregrowafrica.com/	Private	2018	Arable farming
34	RightOrigins	Development	Ethereum	Yes	Public	Farmers' cooperative, NGO	Start-up	https://www.rightorigins.com/right-origins-for-brands/	PPP	2019	Retail, brands
35	Ripe.io	Development	R3 Corda	Yes	Public	Farmers, IoT	Start-up	https://www.ripe.io/	Private	2017	Arable farming
36	SmartCrop	PoC	Ethereum	Yes	Public	Farmers, insurers, traders	Start-up	https://edepot.wur.nl/472583	Private	2018	Arable farming
37	Treecoin	Development	Ethereum	Yes	Public	Consumers, tree growers	Start-up	https://tree-coin.io/	ICO	2019	Forestry
38	Walmart	Rollout	Hyperledger Fabric	No	Permissioned	Retail, supply chain	Multinationals	https://www.hyperledger.org/learn/publications/walmart-case-study	Private	2016	Retail, food
